# Supplementary material for: Flowering retardation by high temperature in chrysanthemums: involvement of FLOWERING LOCUS T-like 3 gene repression
Source: PubMed Central journal article supplement — J Exp Bot. 2013 Jan 10;64(4):909–20. doi: 10.1093/jxb/ers370 (PMC3580808; doi:10.1093/jxb/ers370), 2013-01-10
Supplement: supp_ers370_jexbot086173_file001.pdf [file supp_ers370_jexbot086173_file001.pdf]

Flowering retardation by high temperature in chrysanthemums: involvement of *FLOWERING LOCUS T-like 3* gene repression. Yoshihiro Nakano, Yohei Higuchi, Katsuhiko Sumitomo, Tamotsu Hisamatsu

## SUPPLEMENTARY DATA

**Figure S1.** Representative *C. seticuspe* exposed to 30 °C for 1 week at different growth stages. Plants were grown at 20 °C with a 10-h photoperiod and transferred to 30 °C at the first, second, third, fourth or fifth week. The plants were photographed after 50 SDs.

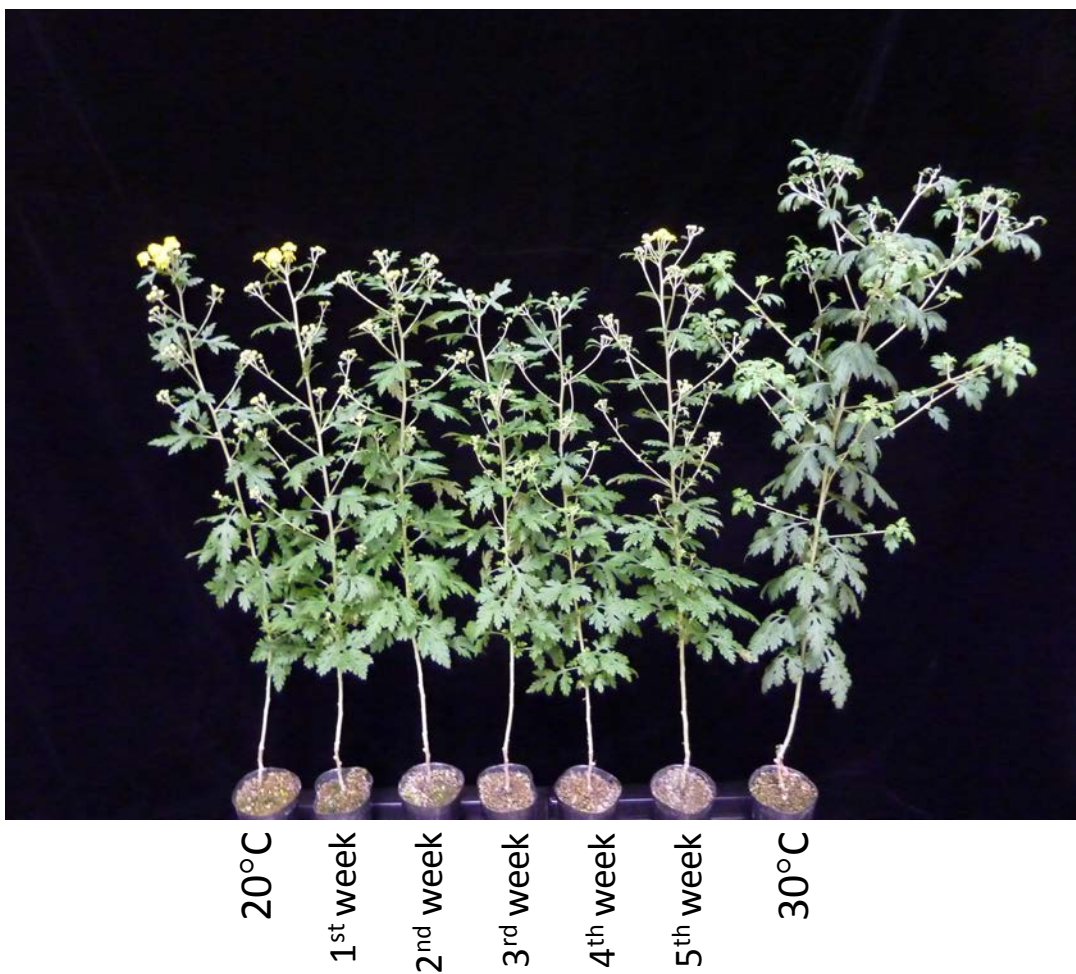

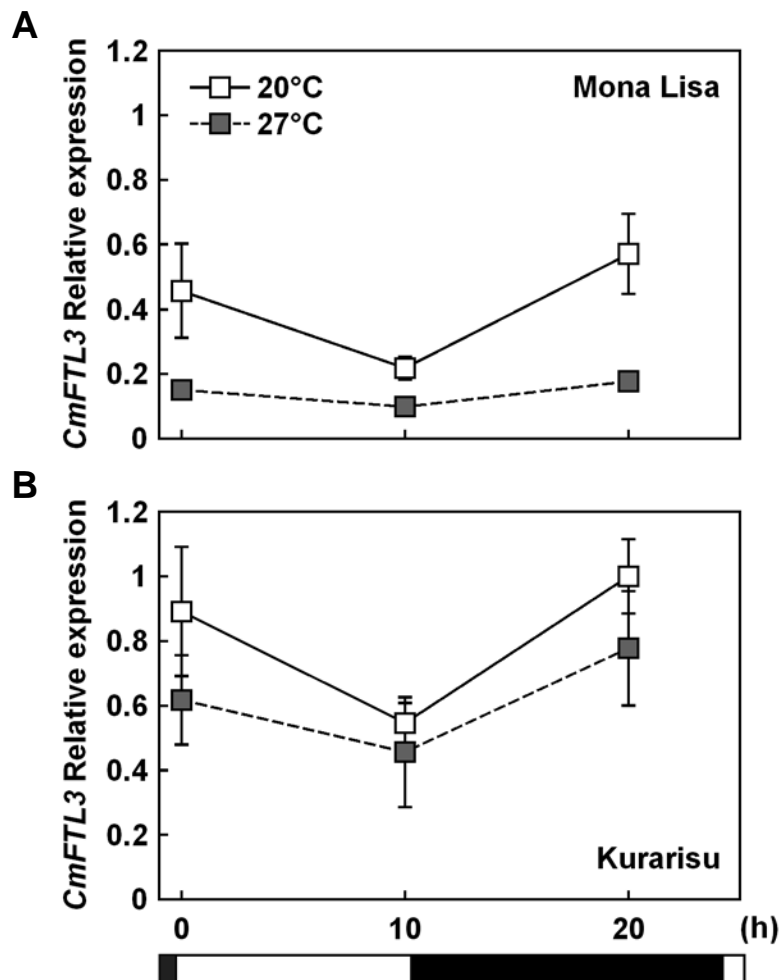

**Fig. S2.** Expression analysis of *CmFTL3* in the leaves of *C. morifolium* 'Mona Lisa' (A) and 'Kurarisu' (B) by using qRT-PCR in grafting experiment. Grafted plants were grown at 20 °C or 27 °C with a 10-h photoperiod. The leaves were harvested from the stock after 3 weeks. Open and closed horizontal bars represent light and dark periods, respectively. *CmACT* was used as an internal standard. Values are means  $\pm$  SE ( $n = 3$ ).

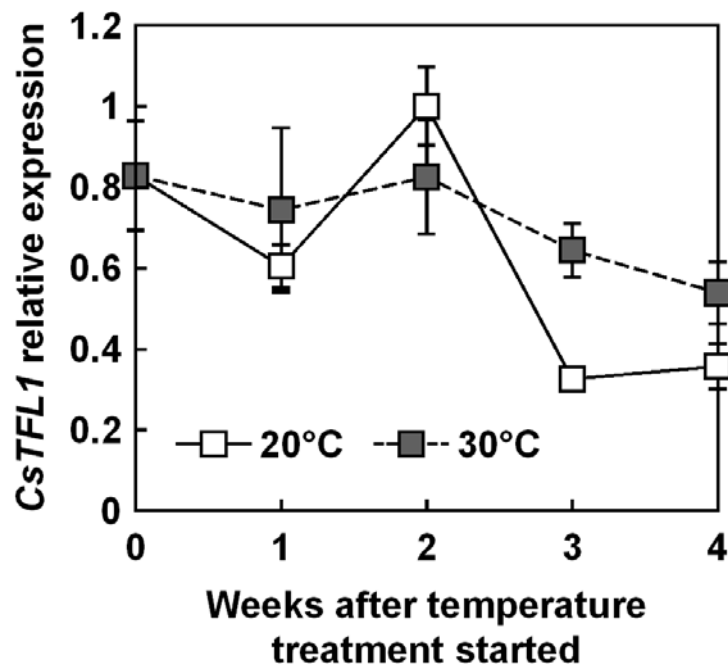

**Fig. S3.** Expression analysis of *CsTFL1* in the shoot tip of *C. seticuspe* by using qRT-PCR. Shoot tips (3 mm) were harvested every 1 week from plants grown at 20 °C or 30 °C with a 10-h photoperiod. *CsEF1 $\alpha$*  was used as an internal standard. Values are means  $\pm$  SE (n = 3).

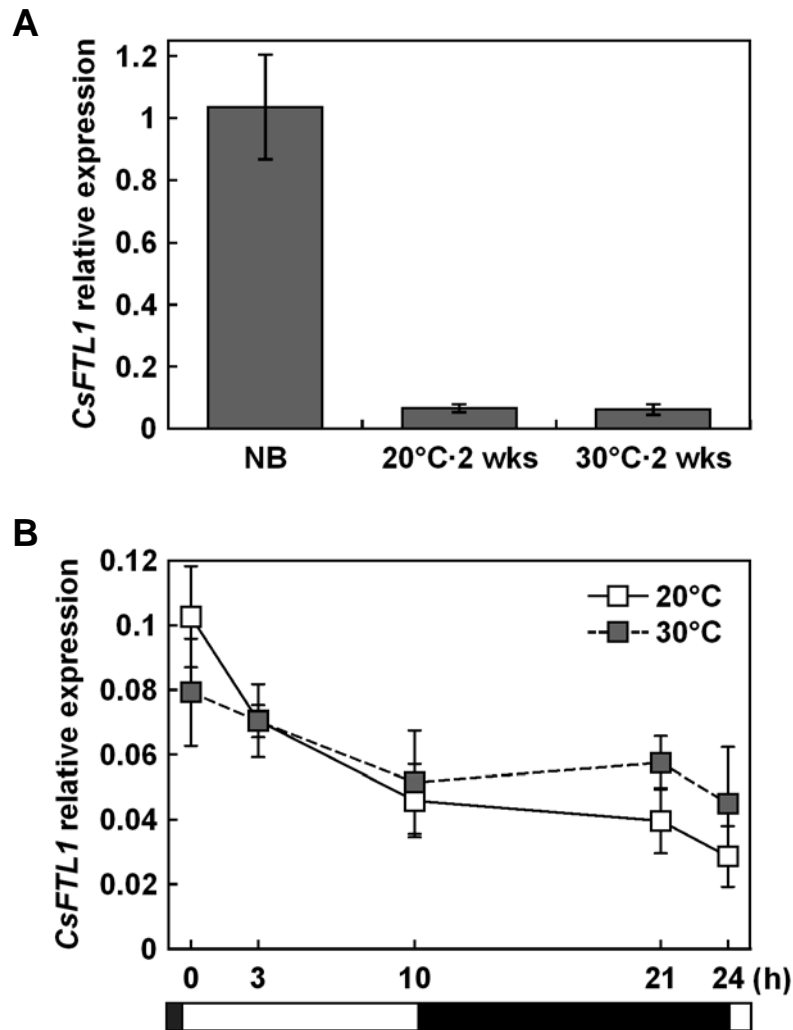

**Fig. S4.** Expression analysis of *CsFTL1* in the leaves of *C. seticuspe* by using qRT-PCR. Plants were grown at 20 °C or 30 °C with a 10 h-photoperiod. The leaves were harvested after 2 weeks. (A) Comparison with NB condition at light on. (B) Diurnal expression changes at 20 °C and 30 °C. Open and closed horizontal bars represent light and dark periods, respectively. *CsACT* was used as an internal standard. Values are means  $\pm$  SE (n = 3).

**Table S1.** Primer sequences used in this study

| Target        | Accession no. | Forward primer           | Reverse primer            |
|---------------|---------------|--------------------------|---------------------------|
| <i>CsFTL3</i> | AB679272      | GAAGGCGTAACAAATAAAAATAGC | CAAGTCTTACAATTTGGTACTGTCC |
| <i>CmFTL3</i> | AB545937      |                          |                           |
| <i>CsACT</i>  | XXXXXXXXX     | CAGGATGAGCAAGGAAATCACC   | AGGTGCTGAGTGATGCAAGGAT    |
| <i>CmACT</i>  | XXXXXXXXX     |                          |                           |
| <i>CsM8</i>   | XXXXXXXXX     | TATCATGCCCCCATGGATGG     | CCATTTACATCCATGGTCC       |
| <i>CsM19</i>  | XXXXXXXXX     | CATGCAATTGCTACTGGAGC     | ATGAACAAGGATAACGAGCC      |
| <i>CsM37</i>  | XXXXXXXXX     | GGTCGAAACTATCTTCAGTCG    | CCAAGAAACCTTAAGTCCTTC     |
| <i>CsM41</i>  | XXXXXXXXX     | CTCGAGCTCATCATGTCTCC     | GGTCTTACGTGTATATGATGC     |
| <i>CsM44</i>  | XXXXXXXXX     | CCATCGGATTCATTAACGGC     | TTACTGCAACTTGGCCCTGC      |
| <i>CsM86</i>  | XXXXXXXXX     | GATTACCAAGCTCATGAACC     | ATTACAAACCTTGGGCAACG      |
| <i>CsTFL1</i> | XXXXXXXXX     | GCAGCCAGAAGACGTTAACC     | GAAGATCCTCACAATTAGGCC     |
| <i>CsFTL1</i> | AB679270      | CATATTGAAAGCACGCACACAT   | ACACGGGTTGGCTGTAGCATT     |
